# Supplementary material for: Thickness Dependent Interlayer Magnetoresistance in Multilayer Graphene Stacks
Source: Hindawi journal article supplement (doi:10.1155/2016/8163742), 2016-01-01
Supplement: f1 [file 8163742.f1.docx]

**Supplementary Information (SI)**

1. **MR Data from ~ 300 nm Thick Batch.**


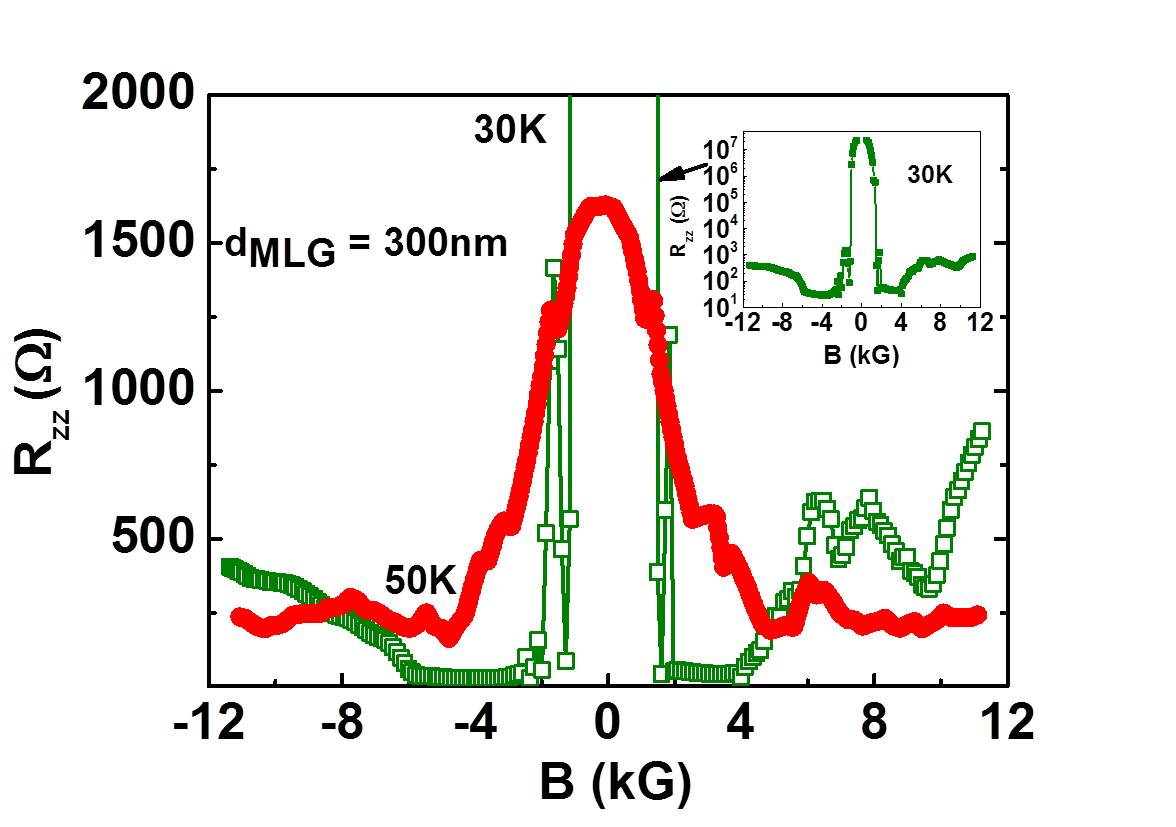


**Figure SI-1.** MR response from various ~ 300 nm thick MLG stacks, showing large variation in the zero field CPP resistance as discussed in the paper.

Figure SI-1 shows MR response from *two different* ~ 300 nm thick MLG stacks. As discussed in the main paper, these samples show a large variation in the zero field CPP resistance due to variation in the misorientation between the neighboring layers. The red curve corresponds to a sample which shows finite (and relatively small) zero field CPP resistance of ~ 1.6kΩ. Strong negative MR and oscillatory features have been observed. The green curve (open square) corresponds to a sample, which shows virtually open circuit at zero magnetic field (similar to Figure 3(c), *main paper*). A small magnetic field of ~ 2kG induces strong negative ILMR effect. High field oscillations have been observed as well. The inset shows this MR response in logarithmic scale and ~ 7 orders of magnitude change in resistance has been observed for this sample.

1. **High-Field Oscillatory MR.**

Figure SI-2 below shows the high field oscillatory MR as observed in the devices reported in the main paper (Figure 3(a)-(c)). These have been plotted after subtracting the background MR. Sharp oscillatory features have been observed. The oscillation amplitude increases with magnetic field for 60nm sample and the amplitudes are comparable for 200nm and 300nm samples. It should be noted that our measurement range is ~10kG and within this range oscillation amplitude does not increase drastically with magnetic field. This is consistent with previous studies such as ref. [1]. As reported in this paper, oscillation amplitude increases over a wider field range of ~ 20 kG, which is inaccessible by our experimental setup. However, to our knowledge such sharp oscillating features, which gradually disappear at higher temperatures (agreeing qualitatively with Lifshitz-Kosevich model), cannot arise from any effect other than quantum oscillations.


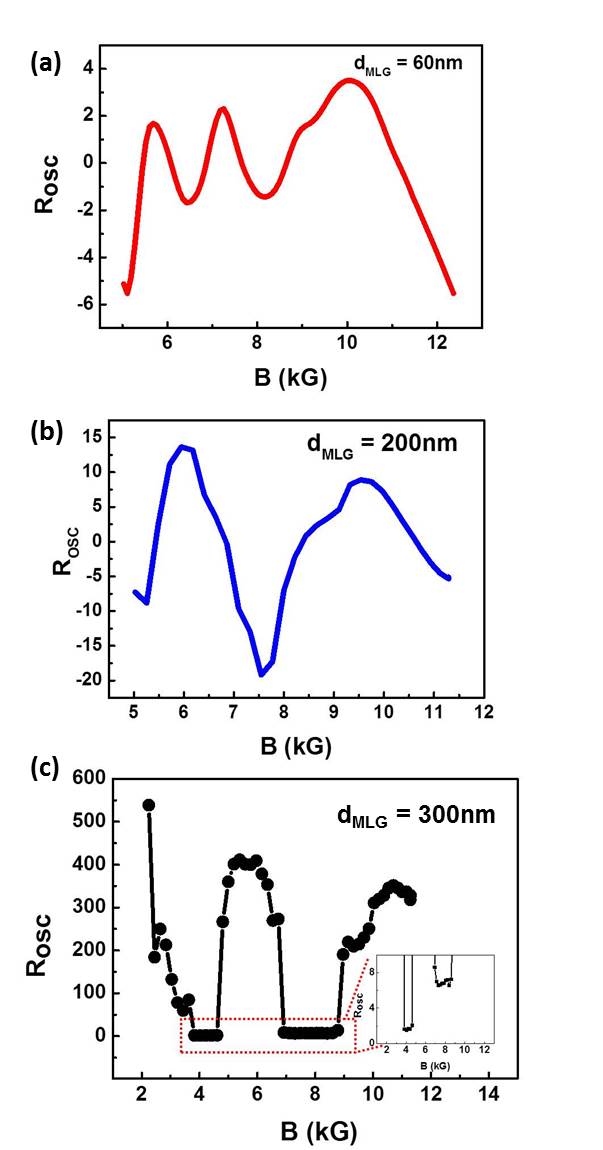


**Figure SI-2.** Oscillatory high-field MR.

1. **In-plane MR Measurements.**

We have performed purely in-plane MR measurements on our samples (Figure SI-3, below), where current is in-plane and magnetic field is out-of-plane. In all cases we have seen weak positive MR (~ few %, ~10 kG range, low temperatures) and no signature of negative MR has been found. Therefore in-plane charge transfer and in-plane mobility do not play a major role in our case.


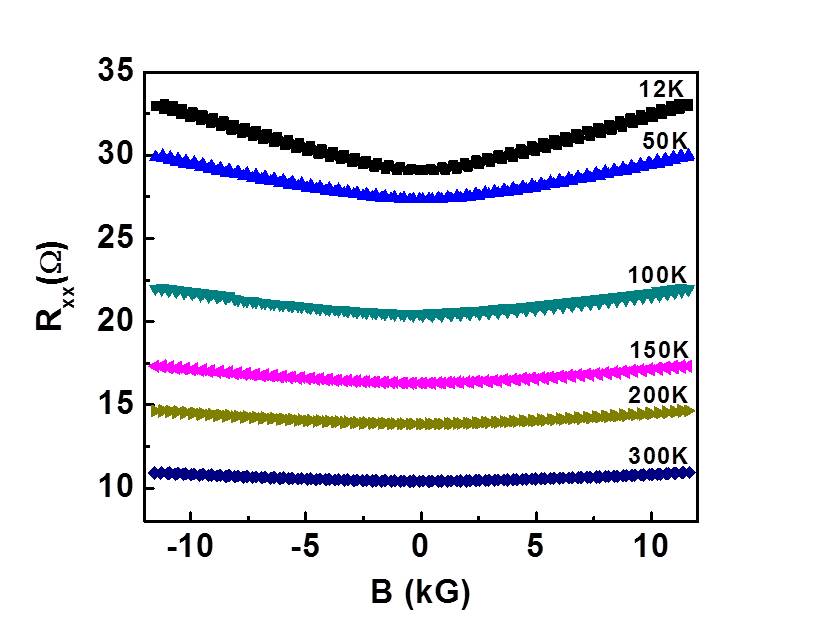


**Figure SI-3.** In-plane MR measurement.

**References**

[1] D. E. Soule, J. W. McClure, and L. B. Smith, “Study of the Shubnikov-de Haas Effect. Determination of the Fermi Surfaces in Graphite,” *Phys. Rev.*, vol. 134, no. 2A, pp. A453–A470, Apr. 1964.
